# Supplementary material
Source: Springer Nature journal article supplement (https://www.springermedizin.de/resource/supplementary/13049_2010_247_MOESM1_ESM.pdf/9666098)

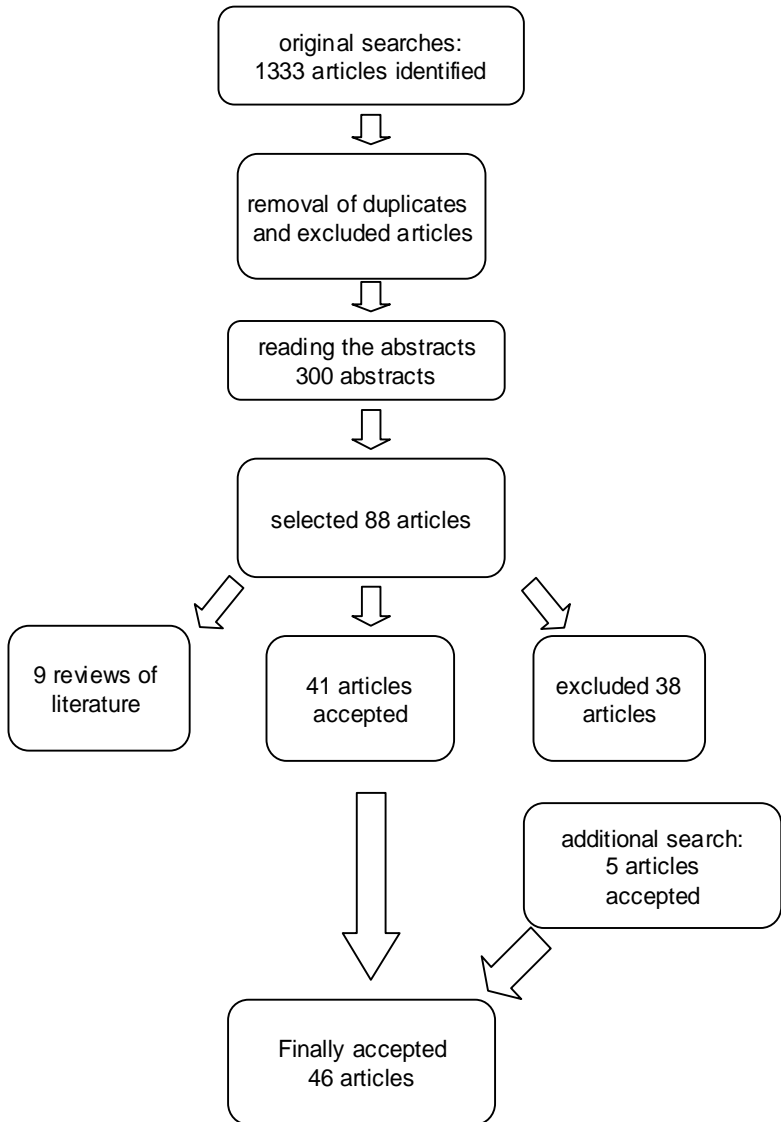

Supplement: MOESM1 [file 9666098]
